# Supplementary material
Source: MDPI journal article supplement (https://www.mdpi.com/2036-7422/14/4/39)
Supplement: s1 [file s1]

## Supplementary Materials

**Table S1.** Epidemiological and clinical feature of the statistically matched patients for the outcome analysis.

|                            | <b>2008-2019<br/>(N = 109)</b> | <b>2020<br/>(N = 109)</b> | <i>p</i> | <i>d</i> |
|----------------------------|--------------------------------|---------------------------|----------|----------|
| Male sex, N (%)            | 50 (45.9)                      | 42 (38.5)                 | 0.337    | 0.170    |
| Age, year, median (IQR)    | 65 (52–77)                     | 64 (47–80)                | 0.718    | 0.040    |
| Comorbidities, N (%)       | 84 (77.1)                      | 85 (78)                   | 1.000    | 0.030    |
| Amylase, U/l, median (IQR) | 595 (282–1199)                 | 670 (203–1132)            | 0.857    | 0.024    |
| Lipase, U/l, median (IQR)  | 1107 (408–3133)                | 1309 (316–2782)           | 0.497    | 0.090    |
| Etiology, N (%)            |                                |                           |          |          |
| Biliary                    | 55 (50.5)                      | 46 (42.2)                 | 0.015    | 0.120    |
| Alcohol                    | 6 (5.5)                        | 16 (14.7)                 |          |          |
| ERCP                       | 2 (1.8)                        | 8 (7.3)                   |          |          |
| Hypertriglyceridemia       | 2 (1.8)                        | 5 (4.6)                   |          |          |
| Drugs                      | 5 (4.6)                        | 2 (1.8)                   |          |          |
| IPMN                       | 7 (6.4)                        | 12 (11)                   |          |          |
| Post-surgical              | 3 (2.8)                        | 0                         |          |          |
| Idiopathic                 | 29 (26.6)                      | 20 (18.4)                 |          |          |
| Familial                   | 0                              | 0                         |          |          |
| Severity, N (%)            |                                |                           |          |          |
| Mild                       | 91 (83.5)                      | 93 (85.3)                 | 0.127    | 0.039    |
| Moderately severe          | 16 (14.7)                      | 12 (11)                   |          |          |
| Severe                     | 2 (1.8)                        | 4 (3.7)                   |          |          |
